# Supplementary material for: Advanced visible-light-driven photocatalyst BiOBr–TiO2–graphene composite with graphene as a nano-filler
Source: Royal Society of Chemistry journal article supplement (doi:10.1039/c3ta14349j), 2014-01-01
Supplement: c3ta14349j.pdf [file c3ta14349j.pdf]

## Supporting information

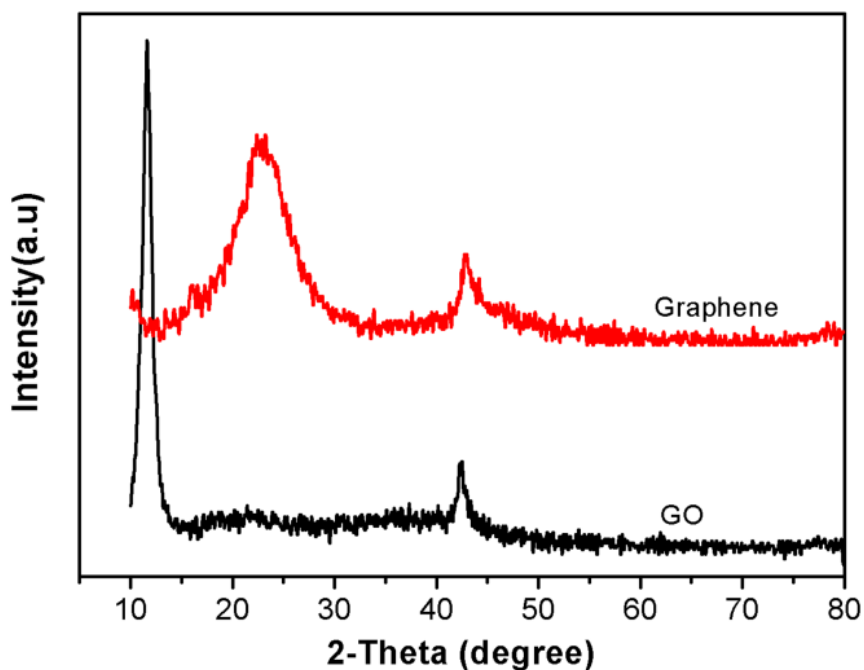

Fig.S1 XRD patterns of GO and Graphene.

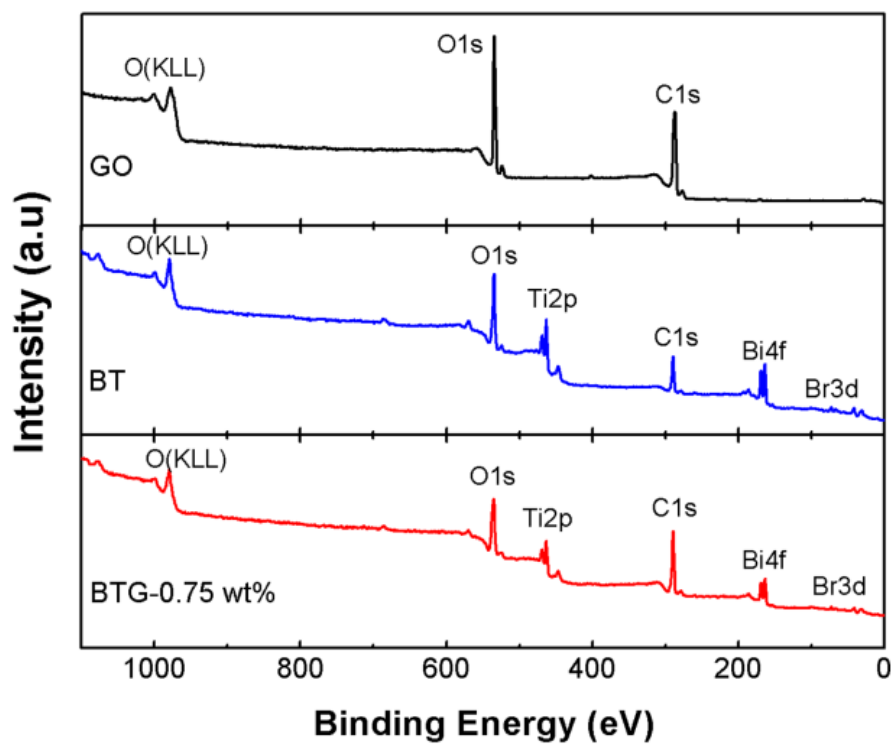

Fig.S2 XPS survey spectra of GO, BT and BTG-0.75 wt%.

Table S1 The element content from the XPS and ICP analysis.

| Sample       | XPS          |              |           | ICP          |              |           |
|--------------|--------------|--------------|-----------|--------------|--------------|-----------|
|              | Bi<br>(at %) | Ti<br>(at %) | n (Ti/Bi) | Bi<br>(wt %) | Ti<br>(wt %) | n (Ti/Bi) |
| BT           | 3.78         | 17.82        | 4.71      | 29.45        | 31.66        | 4.69      |
| BTG-0.75 wt% | 2.48         | 10.10        | 4.07      | 27.44        | 31.14        | 4.95      |

Table S2 The elemental analysis of C, H, O in the sample BT and BTG-0.75 wt%.

| sample       | C (wt%) | O (wt%) | H (wt%) |
|--------------|---------|---------|---------|
| BT           | 8.55    | 6.275   | 2.091   |
| BTG-0.75 wt% | 10.5    | 5.269   | 2.342   |

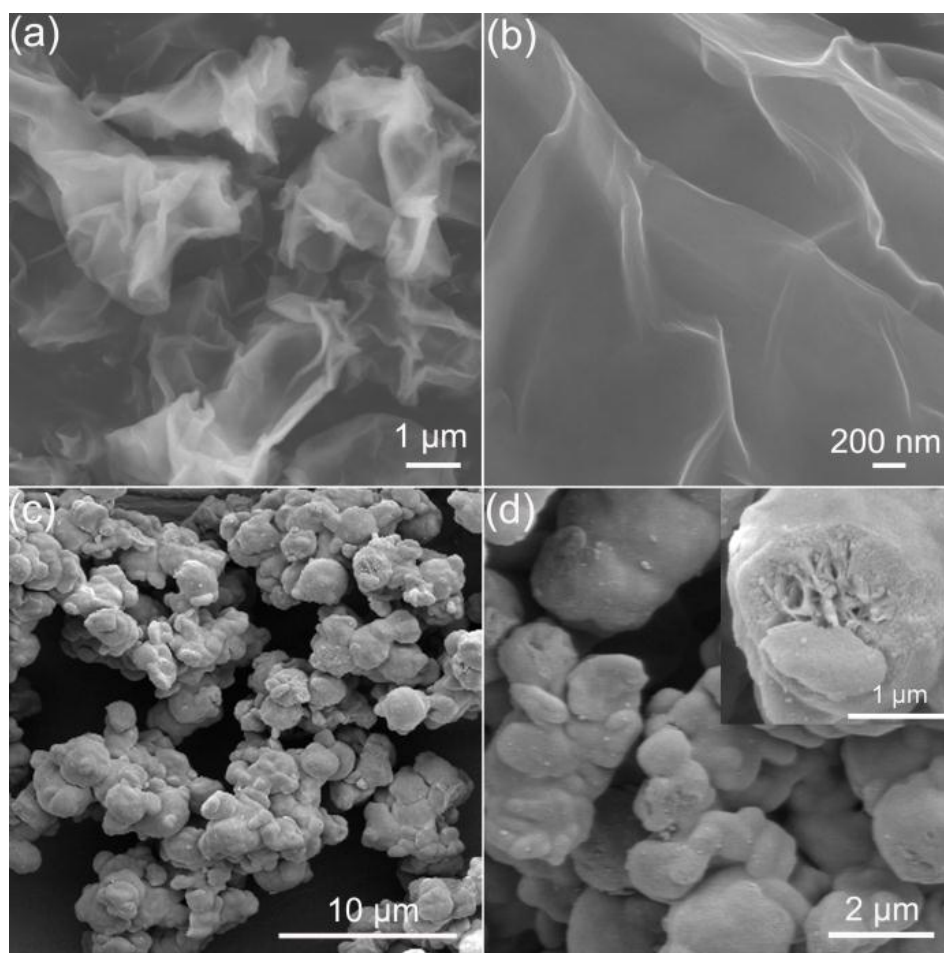

Fig.S3 SEM of GO (a), GO after solvothermal treatment (b), BT (c) and (d).

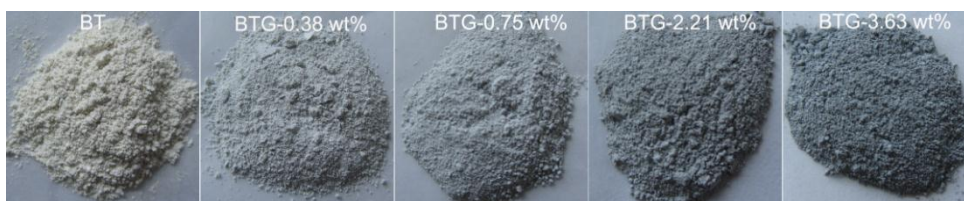

Fig.S4 Photograph of the BT and BTG-X

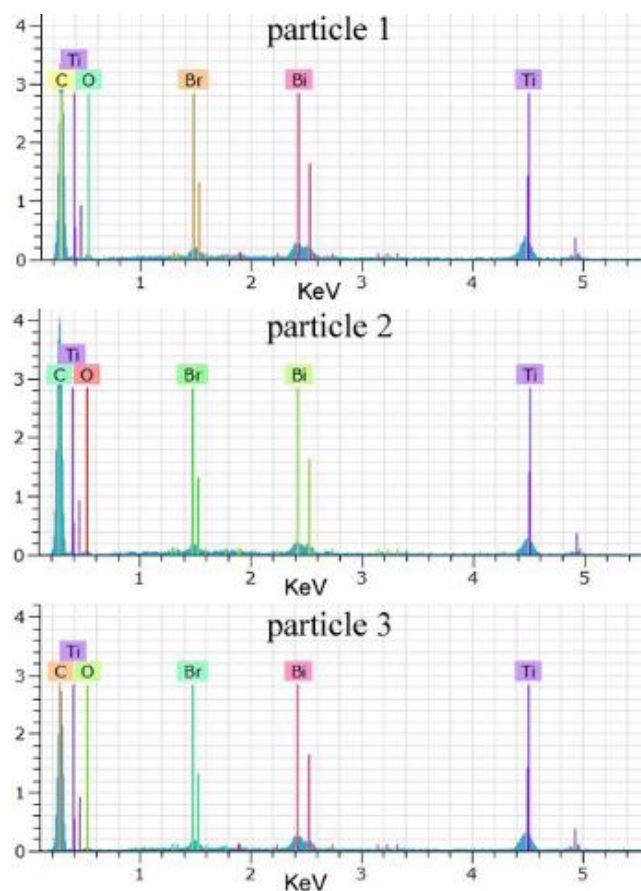

Fig.S5 EDS analysis of different particles in BTG-0.75 wt%.

Table S3 The elemental composition from EDS result.

| BTG-0.75 wt% | Elements (at%) |      |       |      |      | Ti:Bi:Br    |
|--------------|----------------|------|-------|------|------|-------------|
|              | Bi             | Ti   | C     | Br   | O    |             |
| Particle 1   | 0.99           | 6.26 | 88.68 | 0.65 | 3.42 | 6.32/1/0.66 |
| Particle 2   | 0.68           | 4.21 | 91.68 | 0.49 | 2.95 | 6.19/1/0.72 |
| Particle 3   | 0.98           | 6.59 | 88.96 | 0.7  | 2.76 | 6.72/1/0.71 |

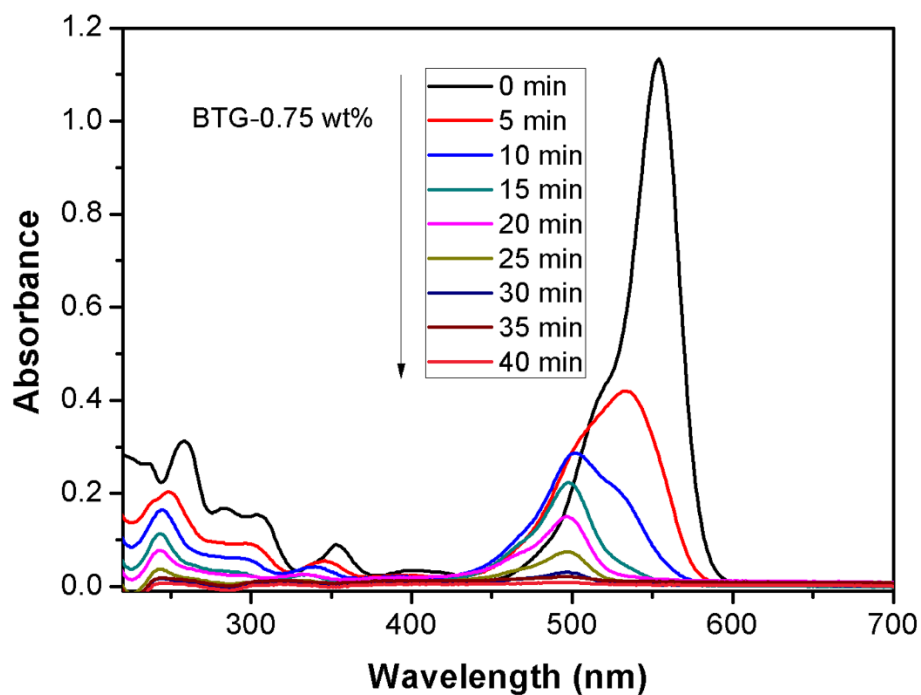

Fig.S6 Time profile of RhB absorbance spectrum observed during photodegradation with BTG-0.75 wt% under visible light irradiation.

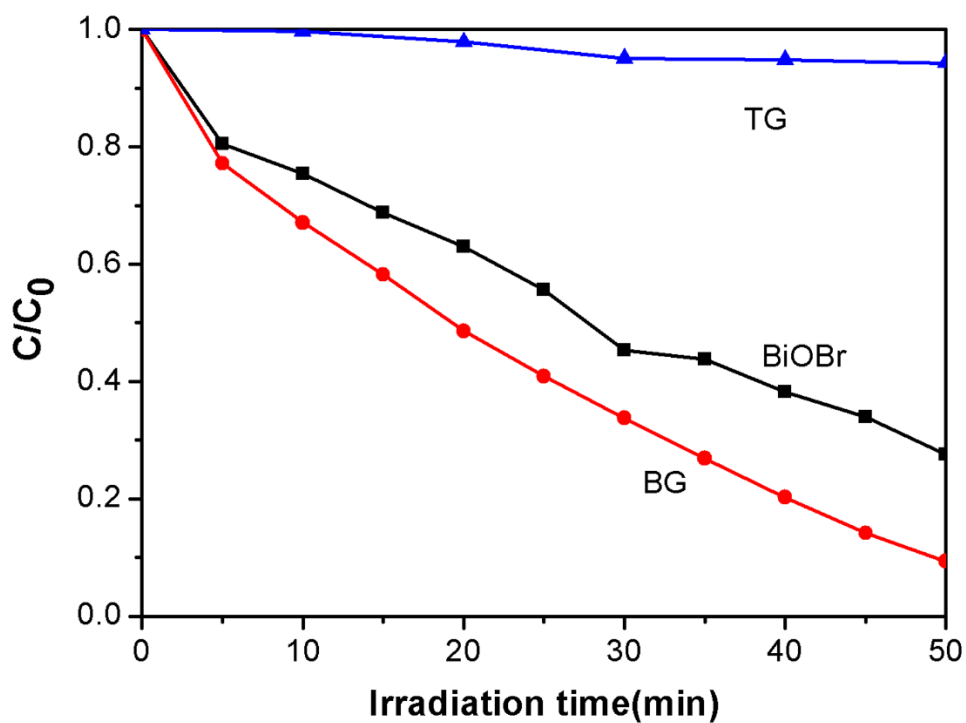

Fig. S7 Variation of RhB concentration against irradiation time using control sample under visible light irradiation ( $\lambda \geq 400\text{nm}$ ).

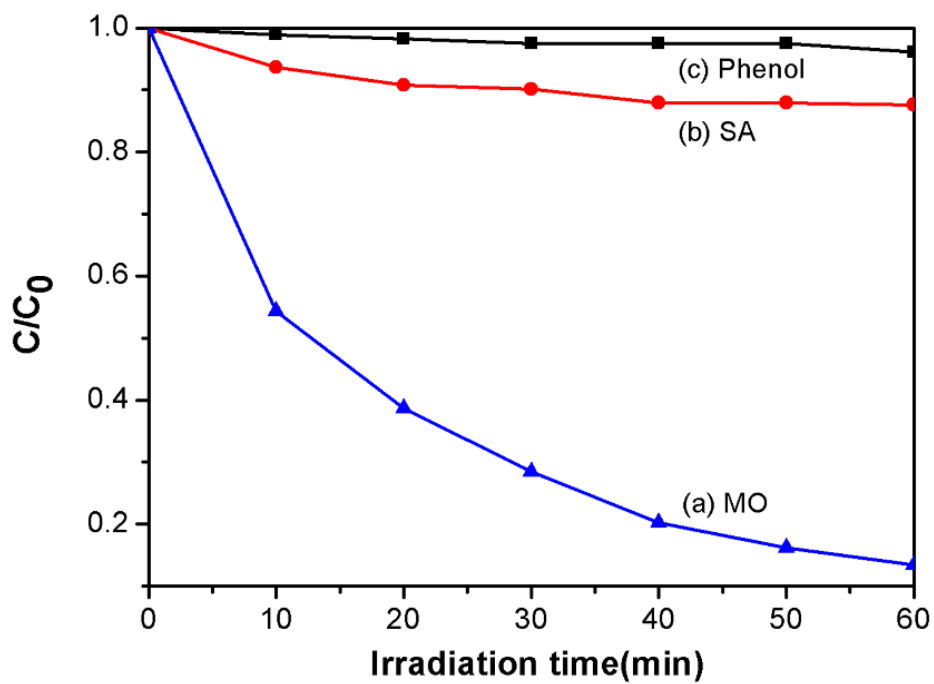

Fig.S8 Reaction process on 25 mg BTG-0.75 wt% with different pollutant  
(a) MO, (b) SA, (c) phenol under visible light irradiation.
